# Supplementary material
Source: Springer Nature journal article supplement (https://www.springermedizin.de/resource/supplementary/12888_2011_881_MOESM2_ESM.pdf/9478444)

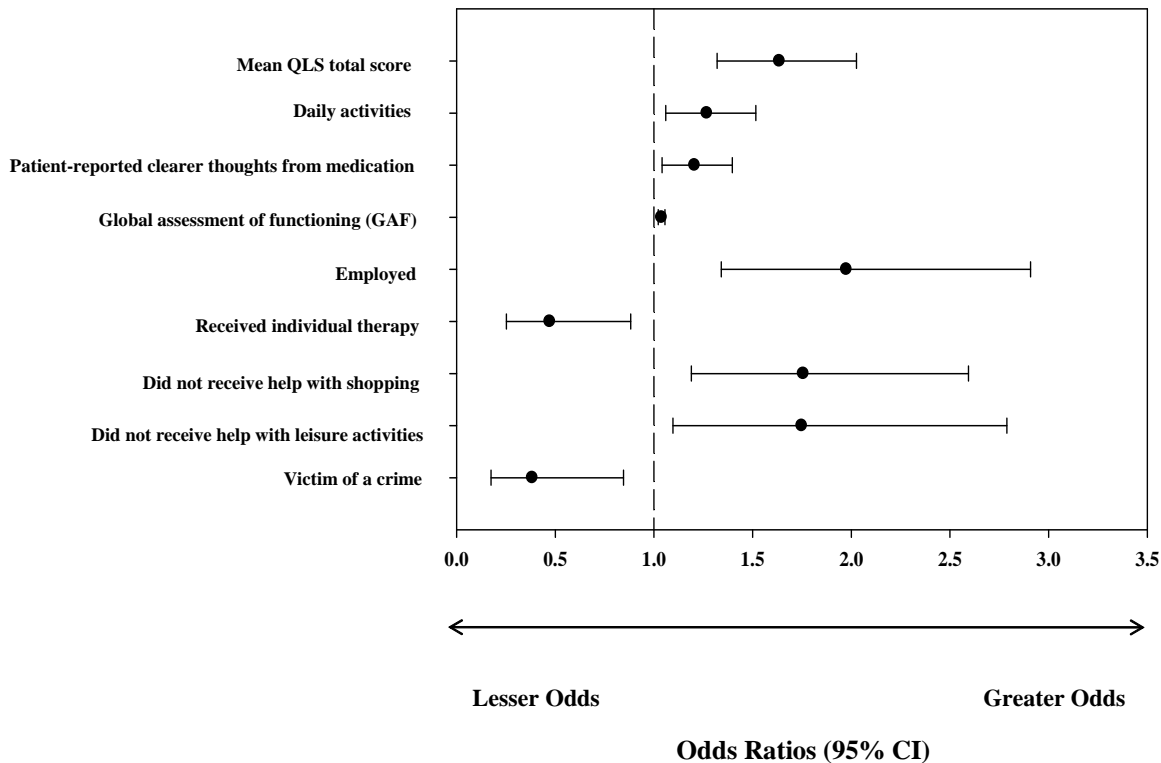

Abbreviation: QLS = Quality of Life Scale.

Supplement: MOESM2 [file 9478444]
